# Supplementary material for: Guided Self-rehabilitation Contract vs conventional therapy in chronic peripheral facial paresis: VISAGE, a multicenter randomized controlled trial
Source: BMC Neurol. 2023 Apr 10;23:148. doi: 10.1186/s12883-023-03096-8 (PMC10084642; doi:10.1186/s12883-023-03096-8)
Supplement: Supplementary file 2 — Additional file 2: Appendix B. Rehabilitation booklet of the guided-self rehabilitation group. [file 12883_2023_3096_MOESM2_ESM.pdf]

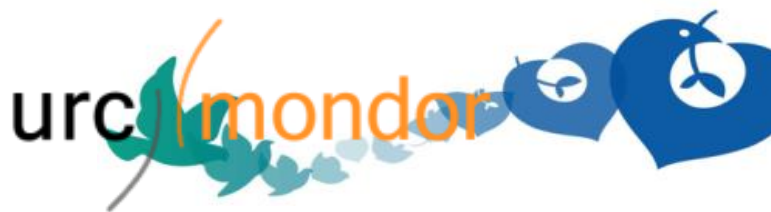

## Carnet de suivi

### VISAGE

#### Groupe Autorééducation

**Effet clinique, cinématique et sur la qualité de vie de deux programmes de rééducation dans la parésie faciale périphérique chronique**

**Merci de compléter ce carnet et de le rapporter à votre médecin à chaque consultation.**

***Les coordonnées de votre médecin figurent à la fin de ce carnet.***

Votre identifiant dans l'étude : |\_|\_|\_| - |\_|\_|\_|\_| - |\_|\_|\_|

(n° de centre, n° d'inclusion, Initiale du nom, Initiale du prénom)

Nom de l'investigateur:

Adresse:

## Préambule

Madame, Monsieur,

L'objectif de l'étude à laquelle vous avez accepté de participer est de comparer deux programmes de rééducation dans la récupération motrice d'une parésie faciale périphérique unilatérale au stade chronique.

Lors de la visite d'inclusion, vous avez été tiré au sort dans le groupe Autorééducation. Ce groupe implique la réalisation d'un programme défini d'entraînement moteur intensif de certains groupes musculaires faciaux en séries fatigantes de contractions maximales. Il repose également sur la tenue quotidienne rigoureuse d'un registre d'exercices dans ce carnet. La poursuite d'une autre prise en charge rééducative n'est pas interdite mais nécessite que vous reportiez la durée et la fréquence des séances ainsi que la réalisation d'un autre travail éventuel à domicile.

Il est important d'apporter ce carnet à chaque visite.

## Consignes importantes

→ Il est nécessaire que les hommes effectuent un rasage la veille au soir ou le matin des 3 demi-journées d'évaluation pour ne pas gêner les évaluations.

→ Il est nécessaire que les femmes ne se maquillent pas ou ne portent pas de crème le matin des 3 demi-journées d'évaluation pour ne pas gêner les évaluations.

→ Le jour des 3 visites (J0, J90 et J180), il est nécessaire de porter un haut de couleur noire et de retirer tous les bijoux au niveau du visage, du cou et des oreilles.

→ Il est important de réaliser votre programme d'exercices quotidiennement et de noter rigoureusement sur le registre chaque jour vos exercices effectués.

## Rappel des traitements interdits durant l'étude

Durant l'étude, certains traitements sont susceptibles de compromettre les évaluations.

Il est important de ne pas avoir recours aux traitements suivants durant votre participation à l'étude :

- Injections de toxine botulique au visage
- Injections d'acide hyaluronique au visage
- Injections de graisse au visage
- Laser au visage
- Chirurgie au visage

## Visite d'inclusion : J-30

- Elle a lieu 30 jours avant le début des évaluations
- Durée : 30 minutes
- Dans un des 5 centres d'inclusion de l'étude
- Déroulement :
  - Explication de l'étude VISAGE
  - Réponses aux questions éventuelles
  - Vérification des critères d'inclusion et de non-inclusion
  - Remise de la note d'information et signature du consentement
  - Inclusion et randomisation dans l'étude
  - Remise de votre carnet-patient à ramener à chaque journée d'évaluation : J0, J90 et J180
- La date de la première évaluation, c'est-à-dire J0, vous sera communiquée dans les jours suivants par un appel téléphonique donné par le service de Rééducation Neurolocomotrice de l'hôpital Henri Mondor de Créteil (centre évaluateur de l'étude).

## Appels téléphoniques

- Durée : 5 minutes par appel
- Vous recevrez 4 appels téléphoniques brefs réalisés par le Dr Gault-Colas, médecin rééducateur affilié à l'étude
- Les appels seront programmés selon le calendrier suivant :
  - J30
  - J60
  - J120
  - J150
- Ils permettront de vérifier la poursuite de votre rééducation
- Le jour et l'heure de chaque appel sera décidé conjointement entre le Dr Gault-Colas et vous.

Ces 3 évaluations auront exclusivement lieu à l'adresse suivante :

**Service de Rééducation Neurolocomotrice de l'hôpital Henri Mondor**  
**Rez de chaussée bas – 51 av du M<sup>al</sup> de Lattre de Tassigny – 94010 Créteil**

### **1ère évaluation - J0 :**

- Durée : 2h30
- Consultation d'évaluation : échelles cliniques, évaluation 3D, auto-questionnaires
- Consultation de rééducation : prescription et explication du programme de rééducation faciale

### **2ème évaluation - J90 :**

- Durée : 1h30
- **Apporter votre registre d'exercices rempli au sein de votre carnet-patient**
- Consultation d'évaluation : échelles cliniques, auto-questionnaires
- Consultation de rééducation : vérification du registre et de la bonne réalisation de la rééducation

### **3ème évaluation - J180 :**

- Durée : 2h30
- **Apporter votre registre d'exercices rempli et votre carnet-patient**
- Consultation d'évaluation : échelles cliniques, évaluation 3D, auto-questionnaires
- Consultation de rééducation : vérification du registre d'exercices, de la bonne réalisation de la rééducation



## Agenda de votre participation à l'étude

|                                       | <b>J-30<br/>Inclusion</b> | <b>J0<br/>Evaluation 1</b> | J30<br>Appel 1 | J60<br>Appel 2 | <b>J90<br/>Evaluation 2</b> | J120<br>Appel 3 | J150<br>Appel 4 | <b>J180<br/>Evaluation 3</b> |
|---------------------------------------|---------------------------|----------------------------|----------------|----------------|-----------------------------|-----------------|-----------------|------------------------------|
| Date                                  |                           |                            |                |                |                             |                 |                 |                              |
| Note d'information                    | X                         |                            |                |                |                             |                 |                 |                              |
| Signature du<br>consentement          | X                         |                            |                |                |                             |                 |                 |                              |
| Vérification critères<br>de sélection | X                         |                            |                |                |                             |                 |                 |                              |
| Randomisation                         | X                         |                            |                |                |                             |                 |                 |                              |
| Prescription de<br>l'Autorééducation  |                           | X                          |                |                |                             |                 |                 |                              |
| Echelles cliniques                    | X                         | X                          |                |                | X                           |                 |                 | X                            |
| Auto-questionnaires                   |                           | X                          |                |                | X                           |                 |                 | X                            |
| Analyse 3D                            |                           | X                          |                |                |                             |                 |                 | X                            |
| Recueil effets<br>indésirables        |                           |                            |                |                | X                           |                 |                 | X                            |
| Appels téléphoniques                  |                           |                            | X              | X              |                             | X               | X               |                              |



# Renforcement moteur

## Muscle Frontal

### Objectifs :

**Améliorer la symétrie du front au repos**  
**Améliorer la mobilité du front pendant la conversation**

**Outil recommandé :** un miroir

**Position de départ** Assis, devant le miroir

**Mouvement** Relever les deux sourcils le plus fort possible pendant 3 secondes. Faites une pause de 1 seconde avant de recommencer le mouvement suivant.

**Exercice** Chaque série de mouvements s'effectue jusqu'à une sensation de fatigue franche obligeant à l'arrêt. La fatigue doit être obtenue en 20-40 répétitions. S'il n'y a toujours pas de sensation de fatigue obligeant à l'arrêt à 40 répétitions, arrêtez-vous.

- **Effectuer 3 séries par jour**
- **Noter sur le registre le nombre de mouvements de relever de sourcils effectués à chaque série.**

*Position de départ*

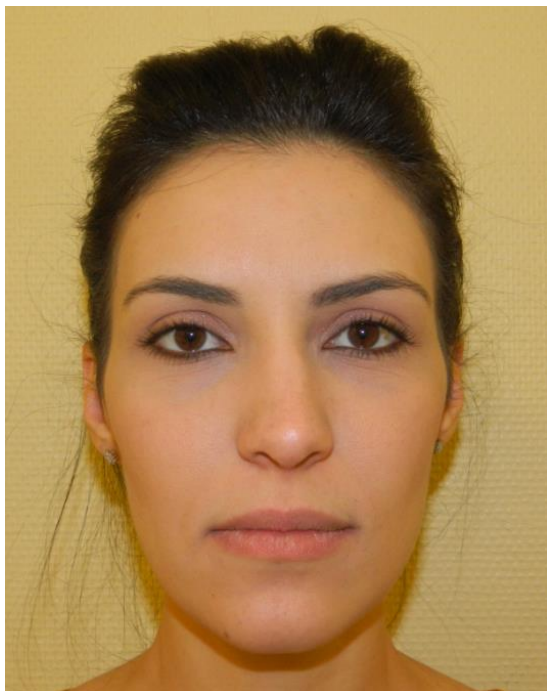

*Mouvement*

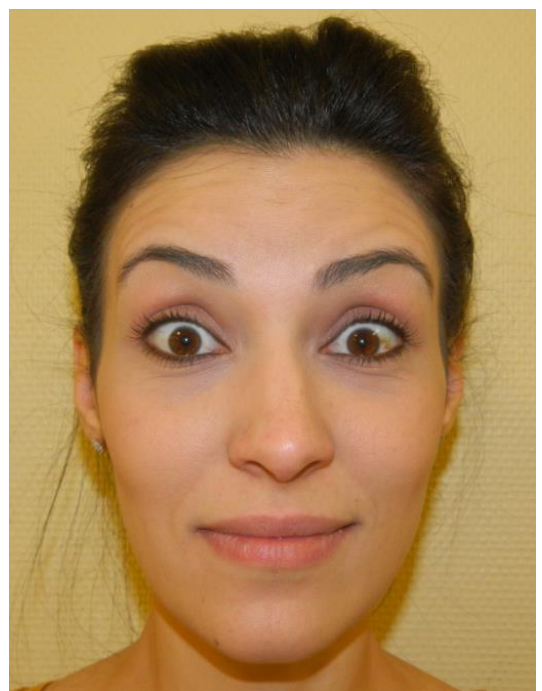

# Renforcement moteur

## Muscle Orbiculaires des paupières

**Objectifs :**

**Améliorer la symétrie et la fermeture de votre œil au repos  
Et en activité**

**Outil recommandé :** un miroir

**Position de départ** Assis, devant le miroir

**Mouvement** Fermer les deux yeux le plus fort possible pendant 3 secondes. Faites une pause de 1 seconde avant de recommencer le mouvement suivant.

**Exercice** Chaque série de mouvements s'effectue jusqu'à une sensation de fatigue franche obligeant à l'arrêt. La fatigue doit être obtenue en 20-40 répétitions. S'il n'y a toujours pas de sensation de fatigue obligeant à l'arrêt à 40 répétitions, il faut recommencer avec un poids plus lourd.

- **Effectuer 3 séries par jour**
- **Noter sur le registre le nombre de mouvements de fermeture des yeux effectués à chaque série.**

*Position de départ*

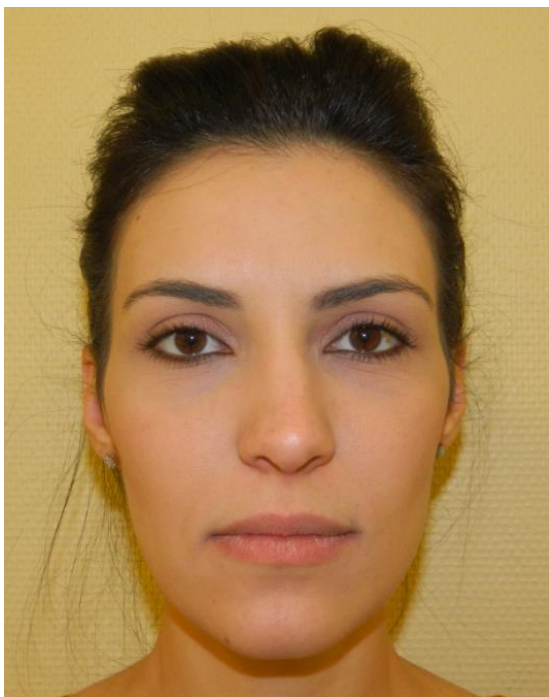

*Mouvement*

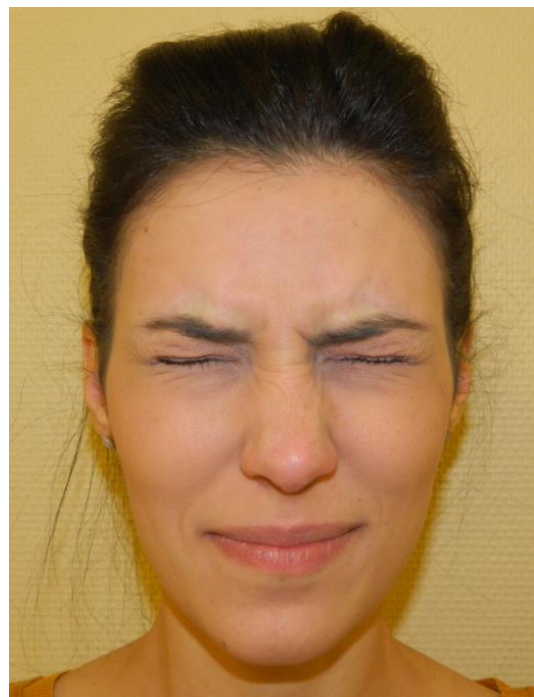

# Renforcement moteur Zygomatiques

## Objectifs :

**Améliorer la symétrie de votre bouche au repos, pendant la conversation et lors du sourire**

**Outil recommandé : un miroir**

**Position de départ** Assis, devant le miroir

**Mouvement** Souriez en montrant les dents le plus fort possible **pendant 3 secondes.** Faîtes une pause de 1 seconde avant de recommencer le mouvement suivant.

**Exercice** Chaque série de mouvements s'effectue jusqu'à une sensation de fatigue franche obligeant à l'arrêt. La fatigue doit être obtenue en 20-40 répétitions. S'il n'y a toujours pas de sensation de fatigue obligeant à l'arrêt à 40 répétitions, arrêtez.

- **Effectuer 3 séries par jour**
- **Noter sur le registre le nombre de mouvements de sourires effectués à chaque série.**

*Position de départ*

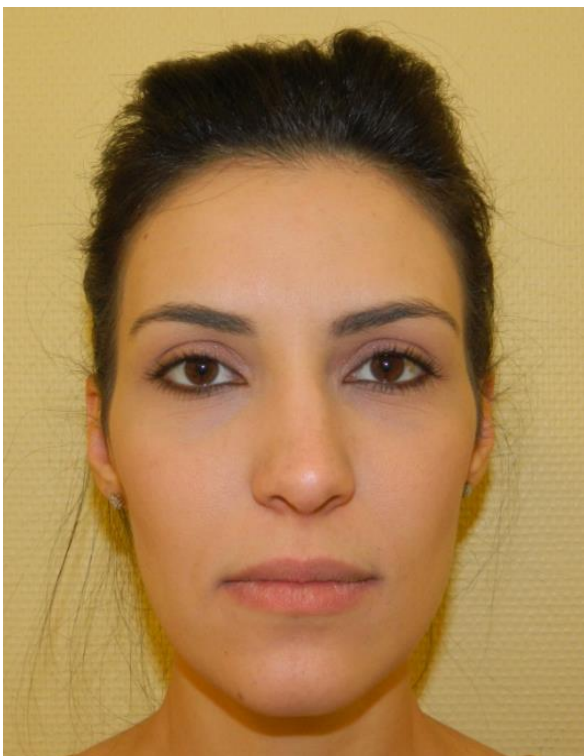

*Mouvement*

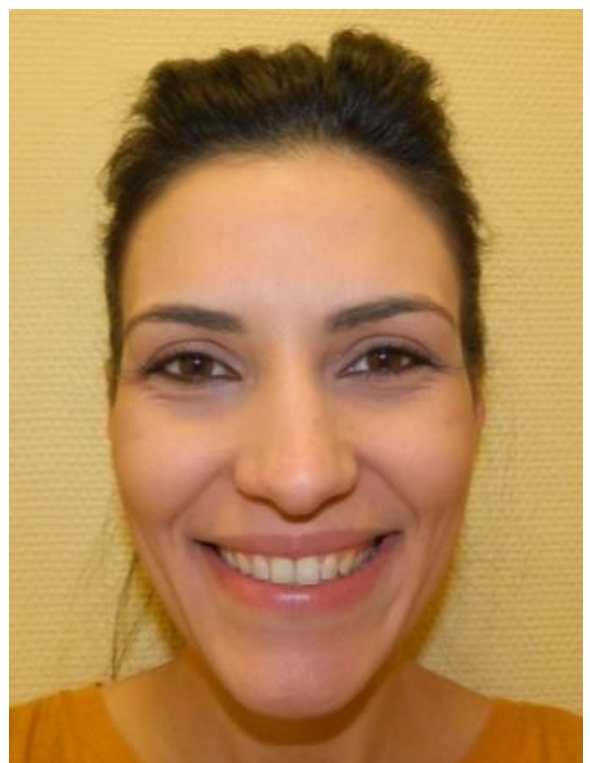

## Contacts

En cas d'impossibilité de vous rendre à une des évaluations, merci de prévenir le service aux coordonnées téléphoniques suivantes :

- Accueil du service – Hôpital Mondor : 01 49 81 24 97 ;
- Secrétariat médical – Mme COOLS – Hôpital Mondor : 01 49 81 24 98 ;
- Secrétariat médical – Mme BLONDEL – Hôpital Chenevier : 01 49 81 30 61.

En cas de nécessité ou de problème médical, vous pouvez joindre le Docteur Dr GAULT-COLAS, médecin de rééducation de l'étude, au courant de votre groupe de traitement, aux coordonnées suivantes :

Service de Rééducation Neurolocomotrice - Hôpital Henri Mondor de Créteil

Secrétariat téléphonique : 01 49 81 24 98 - 01 49 81 24 97 - 01 49 81 30 61

En cas d'absolue nécessité et si les numéros ci-dessus ne fonctionnent pas, vous pouvez joindre le Dr BAUDE, médecin coordinateur principal de l'étude, aux coordonnées suivantes :

Service de Rééducation Neurolocomotrice - Hôpital Henri Mondor de Créteil

Secrétariat téléphonique : 01 49 81 24 98 - 01 49 81 24 97 - 01 49 81 30 61

Adresse mail : [marjolaine.baude@aphp.fr](mailto:marjolaine.baude@aphp.fr)

## Ordonnance d'Autoréducation

Pour les 3 muscles indiqués ci-dessous, effectuez si possible devant miroir des séries de contractions maximales pendant 3 secondes, avec une très courte pause de moins d'une seconde entre deux contractions successives. Chaque série de contractions s'effectue jusqu'à une sensation de fatigue franche obligeant à l'arrêt. **Noter sur le registre le nombre de mouvements effectués à chaque série.**

### 1) Frontal :

#### 3 séries fatigantes par jour

- Relevez les deux sourcils le plus fort possible pendant 3 secondes,
- Relâchez une seconde, puis recommencez.

**Notez sur le registre le nombre de mouvements effectués à chaque série.**

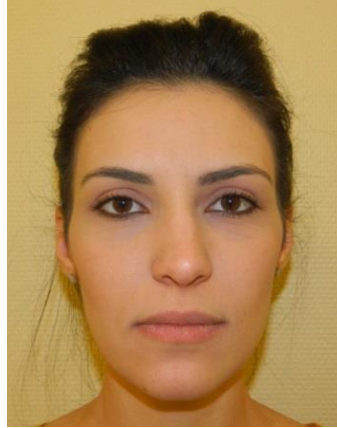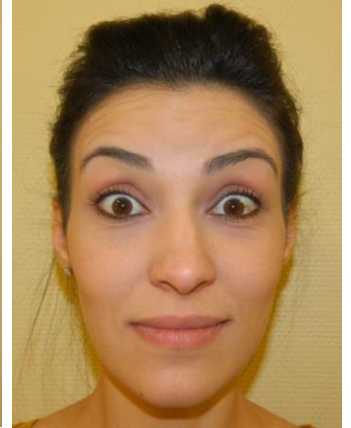

### 2) Orbiculaire des paupières :

#### 3 séries fatigantes/jour

- Fermez les deux yeux le plus fort possible pendant 3 secondes,
- Relâchez une seconde, puis recommencez.

**Notez sur le registre le nombre de mouvements effectués à chaque série.**

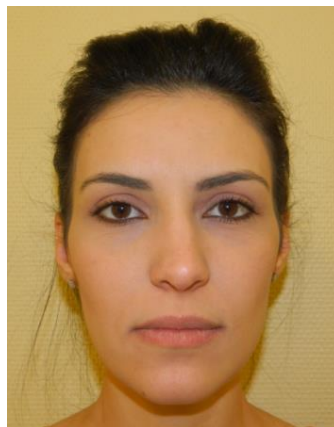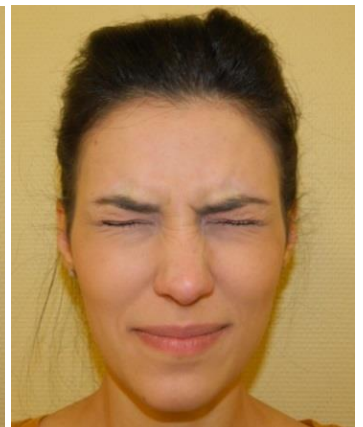

### 3) Zygomatiques :

#### 3 séries fatigantes/jour

- Souriez le plus fort possible bouche ouverte pendant 3 secondes,
- Relâchez une seconde, puis recommencez.

**Notez sur le registre le nombre de mouvements effectués à chaque série.**

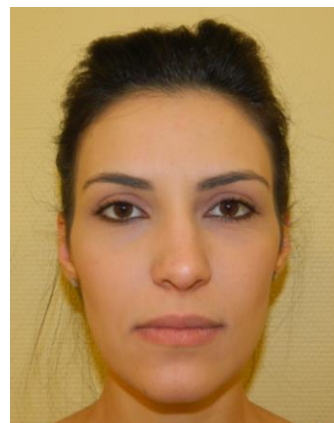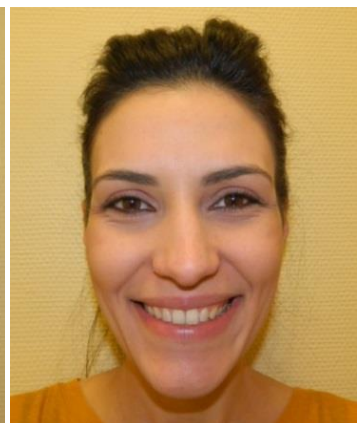

**Tampon et signature :**



## Registre d'exercices

[illegible]





## Registre d'exercices

[illegible]



## Registre d'exercices

[illegible]
